# Supplementary material for: Wafer-Scale Hierarchical Nanopillar Arrays Based on Au Masks and Reactive Ion Etching for Effective 3D SERS Substrate
Source: PubMed Central journal article supplement (PMC5848936; doi:10.3390/ma11020239), 2018-02-04
Supplement: materials-11-00239-s001.pdf [file materials-11-00239-s001.pdf]

# Wafer-scale Hierarchical Nanopillar Arrays Based on Au Masks and Reactive Ion Etching for Effective 3D SERS Substrate

Dandan Men, Yingyi Wu, Chu Wang, JunhuaiXiang, Ganlan Yang, Honghua Zhang\*

Jiangxi Key Laboratory of Surface Engineering, Jiangxi Science and Technology Normal University, Nanchang, Jiangxi 330013, P. R. China

\*Correspondence: zhanghonghua@impcas.ac.cn; Tel.:15270008537

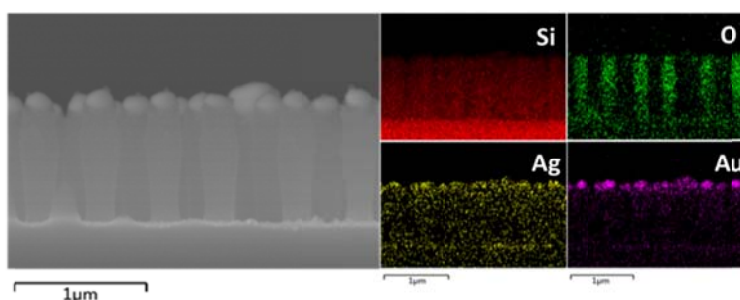

**Figure S1.** Elemental mapping images of the SiO<sub>2</sub> nanopillar arrays decorated with Ag NPs.

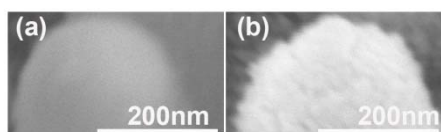

**Figure S2.** Comparison of surfaces for Au-Ag alloy NP on the as-prepared periodic hierarchical SiO<sub>2</sub> nanopillar array before (a) and after (b) depositing Au film.

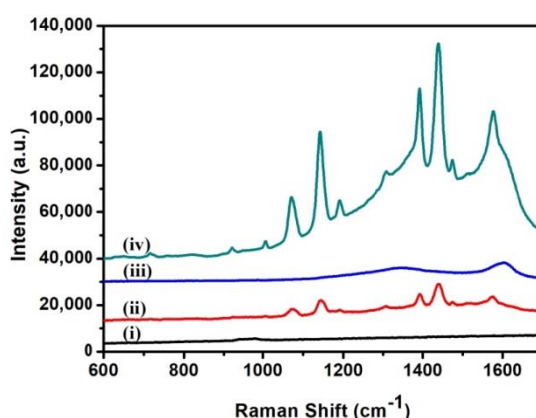

**Figure S3.** Comparison of average Raman spectra for the 10<sup>-4</sup> M 4-ATP on the SiO<sub>2</sub> nanopillars array (i), SiO<sub>2</sub> nanopillars with the Ag film (ii), SiO<sub>2</sub> nanopillar arrays decorated with Ag NPs (iii) and SiO<sub>2</sub> nanopillar arrays decorated with Ag NPs after depositing Au film (iv).
